# Supplementary material for: Characterization of bioactive compounds in defatted hempseed (Cannabis sativaL.) by UHPLC-HRMS/MS and anti-inflammatory activity in primary human monocytes
Source: Royal Society of Chemistry journal article supplement (doi:10.1039/d0fo00066c), 2020-01-01
Supplement: d0fo00066c1.pdf [file d0fo00066c1.pdf]

## Supplementary Material

**Table 1.** Sequences of RT-qPCR primers for gene expression analysis.

| <b>Target</b>                        | <b>GenBank accession number</b> | <b>Direction</b> | <b>Sequence (5'→3')</b> |
|--------------------------------------|---------------------------------|------------------|-------------------------|
| <b><i>TNF<math>\alpha</math></i></b> | NM_000594                       | Forward          | TCCTTCAGACACCCTCAACC    |
|                                      |                                 | Reverse          | AGGCCCCAGTTTGAATTCTT    |
| <b><i>IL6</i></b>                    | NM_000600                       | Forward          | TACCCCCAGGAGAAGATTCC    |
|                                      |                                 | Reverse          | TTTTCTGCCAGTGCCTCTTT    |
| <b><i>CCR2</i></b>                   | NM_001123396.1                  | Forward          | TGCCTGACTCACACTCAAGG    |
|                                      |                                 | Reverse          | GGCTTCTCAGCAACTGAACC    |
| <b><i>CCL2</i></b>                   | NM_002982.3                     | Forward          | CCCCAGTCACCTGCTGTTAT    |
|                                      |                                 | Reverse          | ACGAAGCCATTTGGTAAACG    |
| <b><i>GAPDH</i></b>                  | NM_001289746                    | Forward          | CACATGGCCTCCAAGGAGTAAG  |
|                                      |                                 | Reverse          | CCAGCAGTGAGGGTCTCTCT    |
| <b><i>HPRT</i></b>                   | NM_000194                       | Forward          | ACCCACGAAGTGTTGGATA     |
|                                      |                                 | Reverse          | AAGCAGATGGCCACAGAACT    |

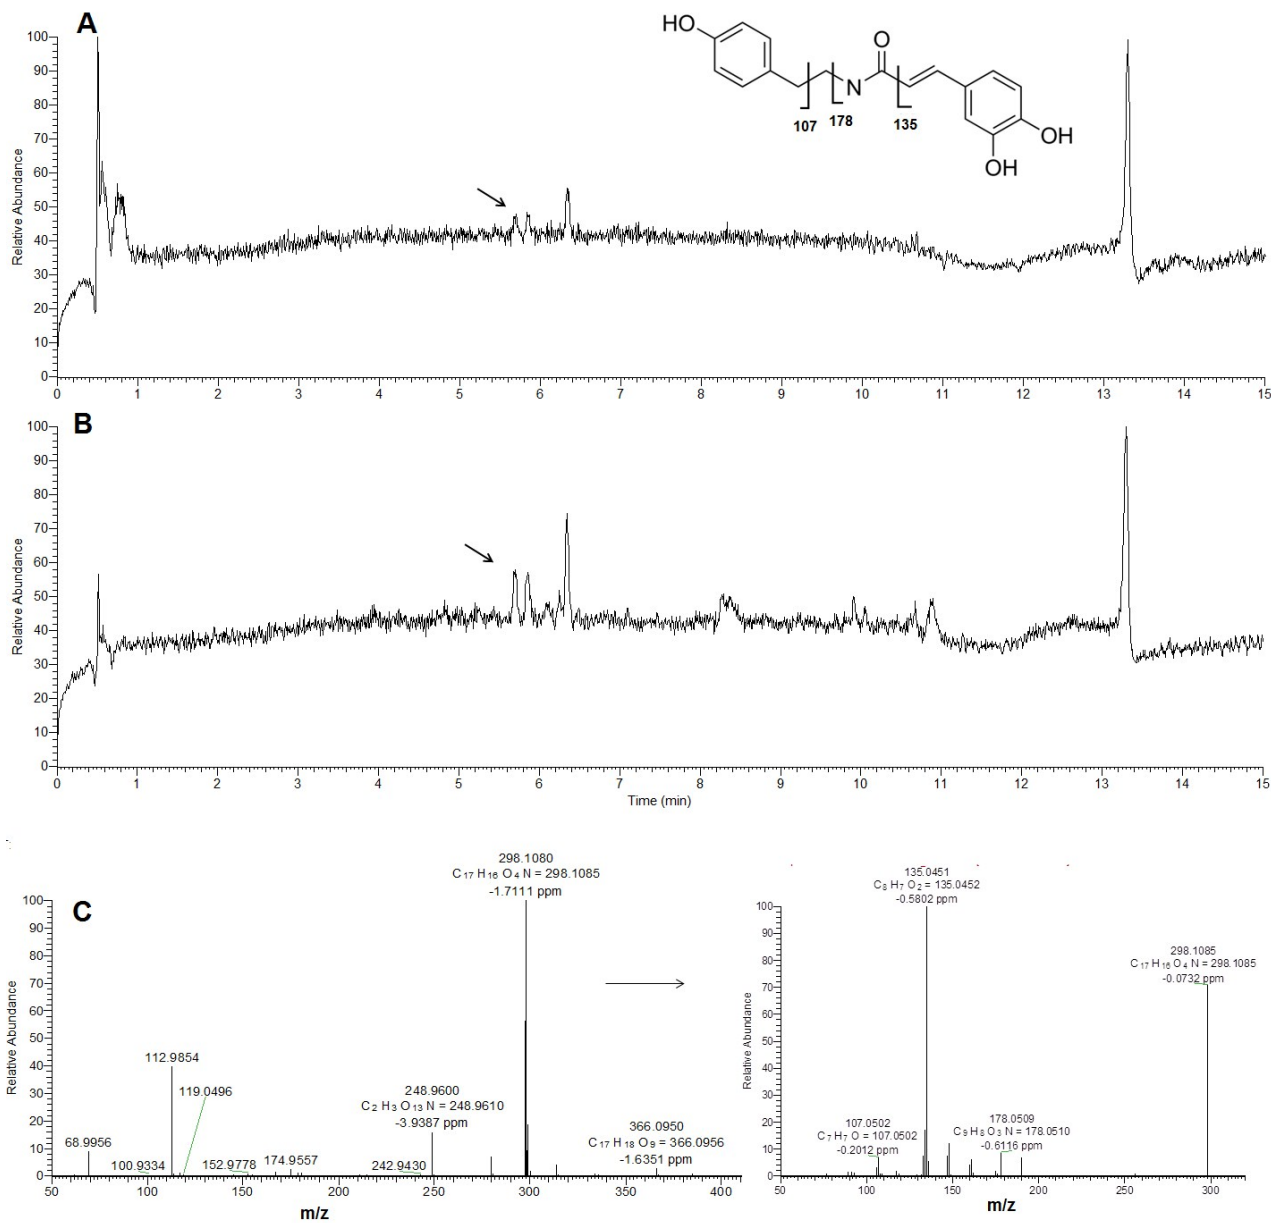

**Fig 1.** UHPLC HRMS/MS chromatograms (negative ion mode): (A) F03 fraction (B) F05 fraction; with arrow the peaks corresponding to *N-trans*-caffeoyltyramine and its MS and MS/MS chromatogram (C).
